# Supplementary material
Source: publisher site journal article supplement (https://www.spandidos-publications.com/3794/downloadSupplementary)

Figure S1. Tan and Im have minimal cytotoxic effects on normal human PBMCs. The normal human PBMCs from three healthy donors were treated with 0.1% DMSO (control), 2  $\mu$ M Im, 4  $\mu$ M Tan or the combination of Im and Tan for 48 h. At the end of the incubation, cell viability was determined using the MTT assay. The data are presented as the mean  $\pm$  SD from three healthy donors. Im, imatinib; PBMCs, peripheral blood mononuclear cells; Tan, tanshinone IIA.

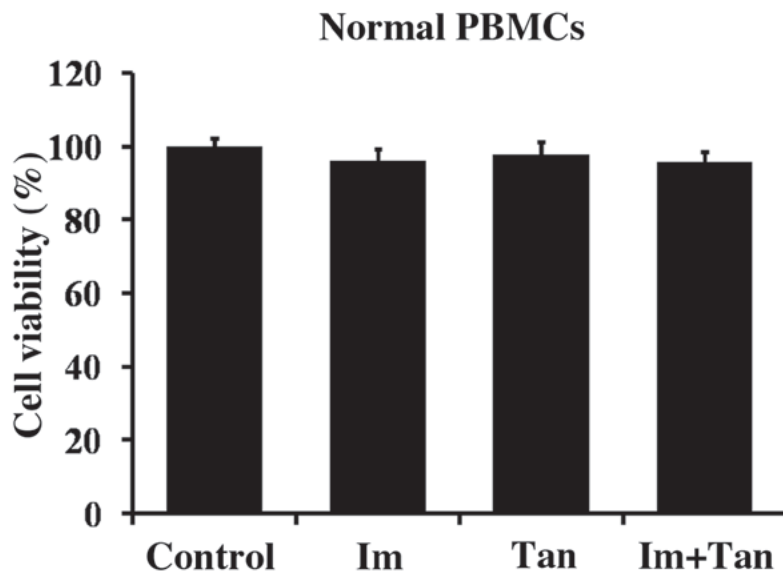

Figure S2. AKT inhibitor MK does not weaken the cytotoxic effects of Tan and Im. (A) SUP-B15 cells were pretreated with 1  $\mu$ M MK, and then treated with 2  $\mu$ M Im, 4  $\mu$ M Tan or the combination of Im and Tan for 48 h. (B) SUP-B15/RI cells were pretreated with 1  $\mu$ M MK, and then treated with 10  $\mu$ M Im, 8  $\mu$ M Tan or the combination of Im and Tan for 48 h. At the end of the incubation, cell viability was determined using the MTT assay. The data are presented as the mean  $\pm$  SD of three independent experiments. Im, imatinib; MK, MK-2206; Tan, tanshinone IIA.

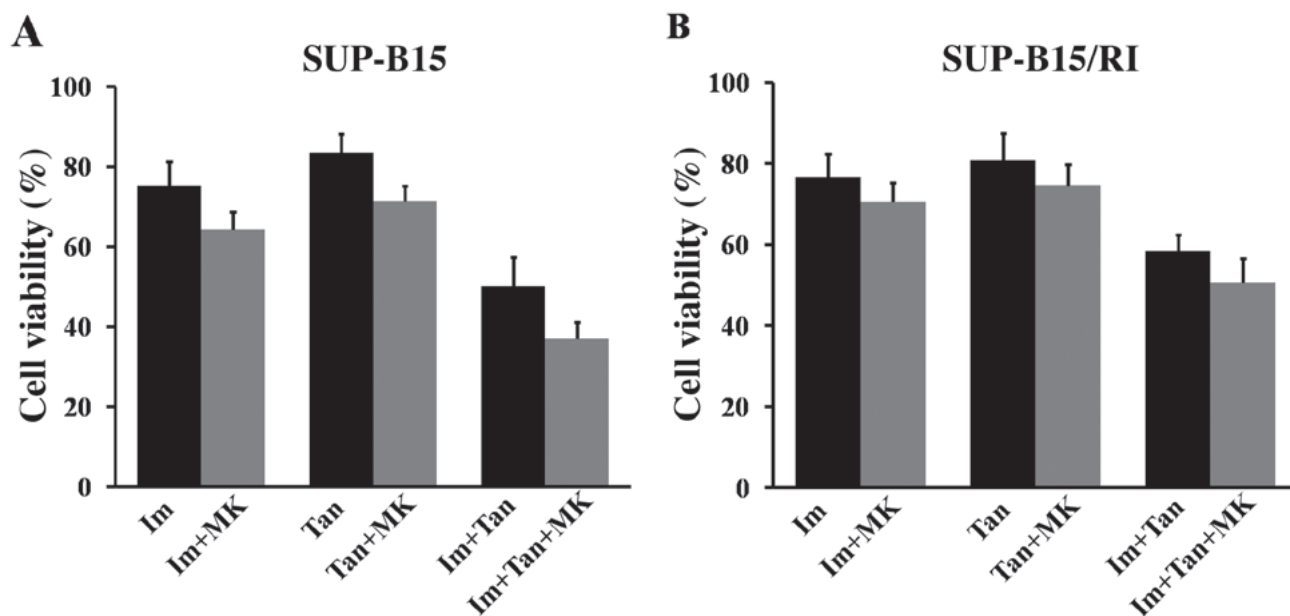

Supplement: Supplementary file 1 [file downloadSupplementary]
